# Supplementary material for: Arylthio-substituted coronenes as tailored building blocks for molecular electronics
Source: Royal Society of Chemistry journal article supplement (doi:10.1039/c2cp23241c), 2011-11-30
Supplement: c2cp23241c.pdf [file c2cp23241c.pdf]

## Supplementary Information to:

# Arylthio-substituted coronenes as tailored building blocks for molecular electronics

Peter Kowalzik, Nicolae Atodiresei, Marc Gingras, Vasile Caciuc, Nicolas Schnaebele, Jean-Manuel Raimundo, Stefan Blügel, Rainer Waser and Silvia Karthäuser

## Analytical data for DFPTC, DPTC, and DMPTC

### Dodecakis[p-(trifluoromethyl)phenylthio]coronene (DFPTC):

orange amorphous powder (98 mg, 58% yield); M.p. 170°C (dec);  $R_f = 0.68$  (SiO<sub>2</sub>, petroleum ether/CH<sub>2</sub>Cl<sub>2</sub>: 60:40 v/v); <sup>1</sup>H NMR (CDCl<sub>3</sub>, 200.13 MHz,  $\delta$  ppm, TMS): 6.64 (24H, d, <sup>3</sup>J= 8.2 Hz), 7.24 (24H, <sup>3</sup>J= 8.2 Hz); <sup>13</sup>C NMR (CDCl<sub>3</sub>, 50.32 MHz,  $\delta$  ppm, TMS): 124.05 (CF<sub>3</sub>, q, <sup>1</sup>J= 270.0 Hz), 124.76 (s), 126.07 (d<sub>app</sub>, <sup>3</sup>J= 2.9 Hz), 126.60 (d<sub>app</sub>, <sup>4</sup>J < 2 Hz), 126.94 (s), 128.69 (q, <sup>2</sup>J= 33.0 Hz), 131.26 (s), 143.67 (s); UV-visible: 271 nm ( $\epsilon = 134910 \text{ M}^{-1} \cdot \text{cm}^{-1}$ ); 429 nm ( $\epsilon = 77155 \text{ M}^{-1} \cdot \text{cm}^{-1}$ ); MALDI-Tof MS (DCTB, THF, positive mode,  $\lambda = 337 \text{ nm}$ ):  $m/z$  calcd for C<sub>108</sub>H<sub>48</sub>S<sub>12</sub>F<sub>36</sub> as [M+H]<sup>+</sup>: 2413.98; found: 2414.0  $m/z$  (maximum isotopic ion).

### Dodecakis-(phenylthio)coronene (DPTC):

deep red powder (260 mg; 69% yield.); M.p. 340°C (dec.);  $R_f = 0.24$  (SiO<sub>2</sub>, petroleum ether/DCM: 60/40); <sup>1</sup>H NMR (200 MHz, CDCl<sub>3</sub>, TMS,  $\delta$  ppm): 6.55 (d<sub>app</sub>,  $J=7.2 \text{ Hz}$ , 24H, Ar-H ortho); 6.94-7.03 (m, 36H, Ar-H meta/para); <sup>13</sup>C NMR (63 MHz, CDCl<sub>3</sub>,  $\delta$  ppm): 128.47 (CH), 126.64 (CH), 125.25 (CH), 120.90 (C-S phenyl); UV-vis (*n*-hexane):  $\lambda_{\text{max}} = 262 \text{ nm}$  ( $\epsilon = 175500 \text{ M}^{-1} \text{cm}^{-1}$ ); 434 nm ( $\epsilon = 125000 \text{ M}^{-1} \text{cm}^{-1}$ ); MALDI-Tof MS (DCTB, THF, positive mode,  $\lambda = 337 \text{ nm}$ );  $m/z$  for C<sub>96</sub>H<sub>60</sub>S<sub>12</sub> [M<sup>+</sup>]: 1596.13; found: 1596.13  $m/z$  (maximum isotopic ion). Cyclic voltammetry: two reversible one-electron reduction waves (vs Fc/Fc<sup>+</sup>):  $E_1^0 = -1.42 \text{ V}$ ;  $E_2^0 = -1.83 \text{ V}$ .

**Dodecakis(*p*-methoxyphenylthio)coronene (DMPTC):**

deep red amorphous powder (261 mg, 95% yield);  $R_f = 0.55$  ( $\text{SiO}_2$ ,  $\text{CH}_2\text{Cl}_2/\text{acetone} : 98:2$  v/v);  $^1\text{H}$  NMR ( $\text{CDCl}_3$ , 200.13 MHz,  $\delta$  ppm, TMS): 6.56 (48H,  $s_{\text{apparent}}$ ), 3.66 (36H, s);  $^{13}\text{C}$  NMR ( $\text{CDCl}_3$ , 50.32 MHz,  $\delta$  ppm, TMS): 55.55, 114.44, 123.98, 129.17, 131.10, 133.02, 158.01, 158.71 ; UV-visible ( $\text{CH}_2\text{Cl}_2$ , 0.02 mM)  $\lambda_{\text{max}} = 461$  nm ( $\epsilon = 66815 \text{ M}^{-1}\text{cm}^{-1}$ ); Maldi-Tof MS (DCTB, THF, positive mode,  $\lambda = 337$  nm) :  $m/z$  calcd for  $\text{C}_{108}\text{H}_{84}\text{O}_{12}\text{S}_{12}$  as  $[\text{M}+\text{H}]^+$ :1957.3; found: 1958.3  $m/z$  (maximum isotopic ion).
